# Supplementary material for: Sequence and Structure Properties Uncover the Natural Classification of Protein Complexes Formed by Intrinsically Disordered Proteins via Mutual Synergistic Folding
Source: MDPI journal article supplement (doi:10.3390/ijms20215460), 2019-11-01
Supplement: s1 [file s1]

## Supplementary Material

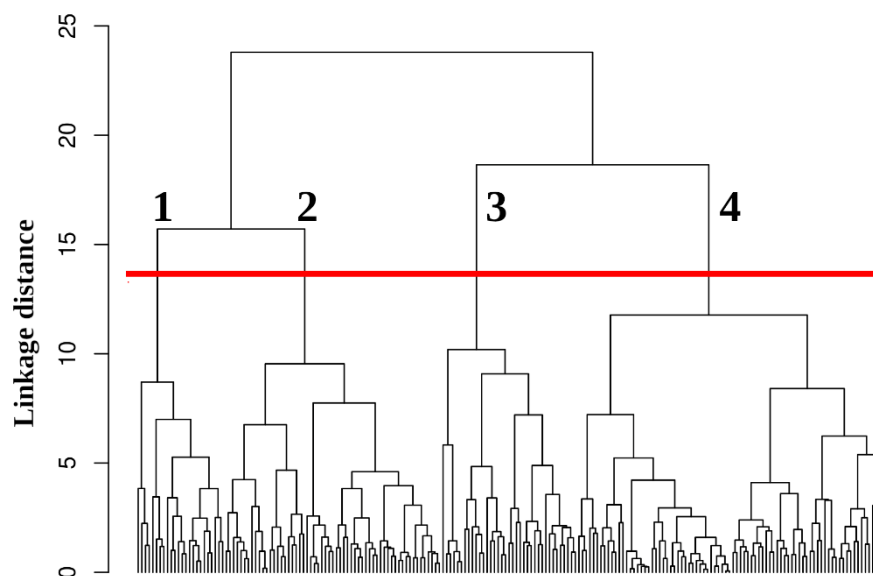

**Figure S1.** Sequence-based hierarchical clustering of complexes formed via MSF. Red line marks the cutoff used to define the four sequence-based clusters.

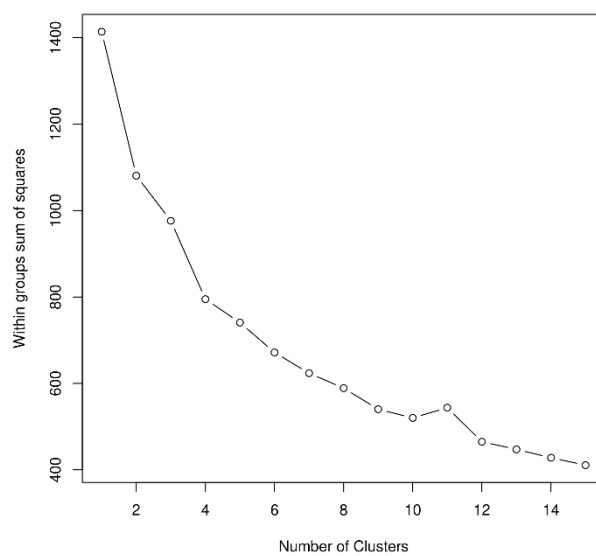

**Figure S2.** The within groups sum of squares as a function of the number of clusters. k-means clustering was done using sequence parameters as input.

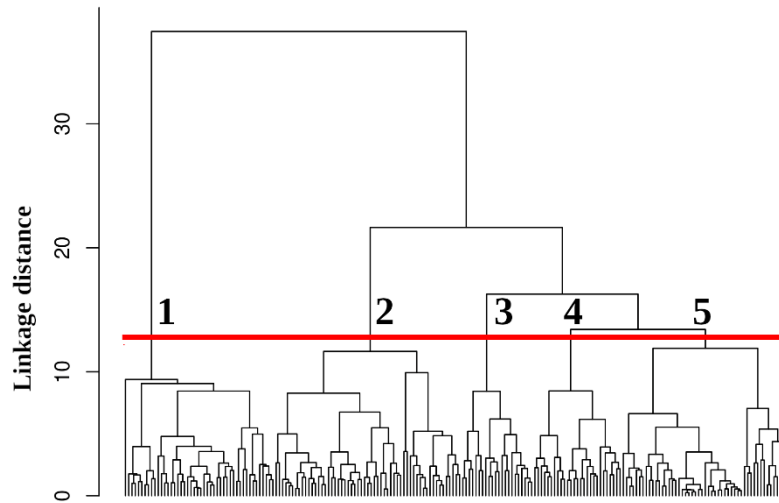

**Figure S3.** Structure-based hierarchical clustering of complexes formed via MSF. Red line marks the cutoff used to define the five structure-based clusters.

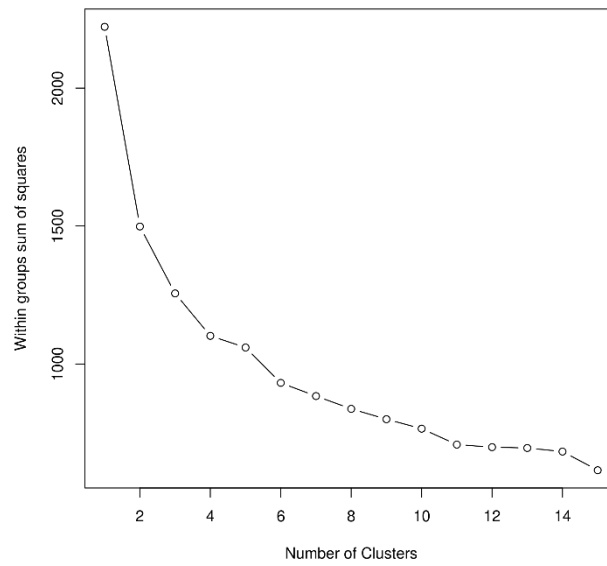

**Figure S4.** The within groups sum of squares as a function of the number of clusters. k-means clustering was done using structure parameters as input.
